# Supplementary material
Source: ML conference proceedings conference paper supplement (https://openaccess.thecvf.com/content/ICCV_2019/html/Ehrlich_Deep_Residual_Learning_ICCV_2019_paper.html)
Supplement: Supplementary file 1 [file Ehrlich_Deep_Residual_Learning_ICCV_2019_supplemental.pdf]

# Supplementary Material

## 1. Proof of the DCT Least Squares Approximation Theorem

**Theorem 1** (DCT Least Squares Approximation Theorem). *Given a set of  $N$  samples of a signal  $X = \{x_0, \dots, x_N\}$ , let  $Y = \{y_0, \dots, y_N\}$  be the DCT coefficients of  $X$ . Then, for any  $1 \leq m \leq N$ , the approximation*

$$p_m(t) = \frac{1}{\sqrt{n}} y_0 + \sqrt{\frac{2}{n}} \sum_{k=1}^m y_k \cos\left(\frac{k(2t+1)\pi}{2n}\right) \quad (1)$$

of  $X$  minimizes the least squared error

$$e_m = \sum_{i=0}^n (p_m(i) - x_i)^2 \quad (2)$$

*Proof.* First consider that since Equation 1 represents the Discrete Cosine Transform, which is a Linear map, we can write rewrite it as

$$D_m^T y = x \quad (3)$$

where  $D_m$  is formed from the first  $m$  rows of the DCT matrix,  $y$  is a row vector of the DCT coefficients, and  $x$  is a row vector of the original samples.

To solve for the least squares solution, we use the the normal equations, that is we solve

$$D_m D_m^T y = D_m x \quad (4)$$

and since the DCT is an orthonormal transformation, the rows of  $D_m$  are orthogonal, so  $D_m D_m^T = I$ . Therefore

$$y = D_m x \quad (5)$$

Since there is no contradiction, the least squares solution must use the first  $m$  DCT coefficients.  $\square$

## 2. Proof of the DCT Mean-Variance Theorem

**Theorem 2** (DCT Mean-Variance Theorem). *Given a set of samples of a signal  $X$  such that  $E[X] = 0$ , let  $Y$  be the DCT coefficients of  $X$ . Then*

$$\text{Var}[X] = E[Y^2] \quad (6)$$

*Proof.* Start by considering  $\text{Var}[X]$ . We can rewrite this as

$$\text{Var}[X] = E[X^2] - E[X]^2 \quad (7)$$

Since we are given  $E[X] = 0$ , this simplifies to

$$\text{Var}[X] = E[X^2] \quad (8)$$

Next, we express the DCT as a linear map such that  $X = DY$  and rewrite the previous equation as

$$\text{Var}[X] = E[(DY)^2] \quad (9)$$

Squaring gives

$$E[(DY)^2] = E[(D^T D)Y^2] \quad (10)$$

Since  $D$  is orthogonal this simplifies to

$$E[(D^T D)Y^2] = E[(D^{-1} D)Y^2] = E[Y^2] \quad (11)$$

$\square$

## 3. Algorithms

We conclude by outlining in pseudocode the algorithms for the three layer operations described in the paper. Algorithm 1 gives the code for convolution explosion, Algorithm 2 gives the code for the ASM ReLu approximation, and Algorithm 3 gives the code for Batch Normalization.

---

**Algorithm 1** Convolution Explosion.  $K$  is an initial filter,  $p, p'$  are the input and output channels,  $h, w$  are the image height and width,  $s$  is the stride,  $\star_s$  denotes the discrete convolution with stride  $s$ .  $J$  and  $\tilde{J}$  are constants of shape  $(x, y, k, h, w)$  with  $y = h/8, x = w/8, k = 64$ .

---

```

function EXPLODE( $K, p, p', h, w, s$ )
   $d_j \leftarrow \text{shape}(\tilde{J})$ 
   $d_b \leftarrow (d_j[0], d_j[1], d_j[2], 1, h, w)$ 
   $\hat{J} \leftarrow \text{reshape}(\tilde{J}, d_b)$ 
   $\hat{C} \leftarrow \hat{J} \star_s K$ 
   $d_c \leftarrow (p, p', d_j[0], d_j[1], d_j[2], h/s, h/s)$ 
   $\tilde{C} \leftarrow \text{reshape}(\hat{C}, d_c)$ 
  return  $\tilde{C}_{p'hw}^{pxyk} J_{x'y'k'}$ 

```

---

**Algorithm 2** Approximated Spatial Masking for ReLu.  $F$  is a DCT domain block,  $\phi$  is the desired maximum spatial frequencies,  $N$  is the block size.

---

```

function RELU( $F, \phi, N$ )
   $M \leftarrow$  ANNM( $F, \phi, N$ )
  return APPLYMASK( $F, M$ )
function ANNM( $F, \phi, N$ )
   $I \leftarrow$  zeros( $N, N$ )
  for  $i \in [0, N)$  do
    for  $j \in [0, N)$  do
      for  $\alpha \in [0, N)$  do
        for  $\beta \in [0, N)$  do
          if  $\alpha + \beta \leq \phi$  then
             $I_{ij} \leftarrow I_{ij} + F_{ij} D_{ij}^{\alpha\beta}$ 
   $M \leftarrow$  zeros( $N, N$ )
   $M[I > 0] \leftarrow 1$ 
  return  $M$ 
function APPLYMASK( $F, M$ )
  return  $H_{\alpha'\beta'}^{\alpha\beta ij} F_{\alpha\beta} M_{ij}$ 

```

---

**Algorithm 3** Batch Normalization.  $F$  is a batch of JPEG blocks (dimensions  $N \times 64$ ),  $S$  is the inverse quantization matrix,  $m$  is the momentum for updating running statistics,  $t$  is a flag that denotes training or testing mode. The parameters  $\gamma$  and  $\beta$  are stored externally to the function.  $\hat{\cdot}$  is used to denote a batch statistic and  $\tilde{\cdot}$  is used to denote a running statistic.

---

```

function BATCHNORM( $F, S, m, t$ )
  if  $t$  then
     $\mu \leftarrow$  mean( $F[:, 0]$ )
     $\hat{\mu} \leftarrow F[:, 0]$ 
     $F[:, 0] = 0$ 
     $D_g \leftarrow F_k S_k$ 
     $\hat{\sigma}^2 \leftarrow$  mean( $F^2, 1$ )
     $\sigma^2 \leftarrow$  mean( $\hat{\sigma}^2 + \hat{\mu}^2$ ) -  $\mu^2$ 
     $\tilde{\mu} \leftarrow \hat{\mu}(1 - m) + \mu m$ 
     $\sigma^2 \leftarrow \hat{\sigma}^2(1 - m) + \mu m$ 
     $F[:, 0] \leftarrow F[:, 0] - \mu$ 
     $F \leftarrow \frac{\gamma F}{\sigma}$ 
     $F[:, 0] \leftarrow F[:, 0] + \beta$ 
  else
     $F[:, 0] \leftarrow F[:, 0] - \tilde{\mu}$ 
     $F \leftarrow \frac{\gamma F}{\tilde{\sigma}}$ 
     $F[:, 0] \leftarrow F[:, 0] + \beta$ 
  return  $F$ 

```
